# Supplementary material for: Unleashing the power of boron: enhancing nitrogen reduction reaction through defective ReS2 monolayers
Source: Royal Society of Chemistry journal article supplement (doi:10.1039/d3cp02647g), 2023-01-01
Supplement: d3cp02647g1.pdf [file d3cp02647g1.pdf]

## Supporting Information

# Unleashing Power of Boron: Enhancing Nitrogen Reduction Reaction Through Defective ReS<sub>2</sub> Monolayers

Thi H. Ho<sup>a,b,#</sup>, Viet Q. Bui<sup>c,#,\*</sup>, Quynh Anh T. Nguyen<sup>c</sup>, Yoshiyuki Kawazoe<sup>d,e,f</sup>, Seong-Gon Kim<sup>g</sup> and Pham Cam Nam<sup>c,h</sup>

---

<sup>a</sup> *Laboratory for Computational Physics, Institute for Computational Science and Artificial Intelligence, Van Lang University, Ho Chi Minh City, Vietnam.*

<sup>b</sup> *Faculty of Mechanical - Electrical and Computer Engineering, School of Technology, Van Lang University, Ho Chi Minh City, Vietnam. Email: thi.hohuynh@vlu.edu.vn*

<sup>c</sup> *Advanced Institute of Science and Technology, The University of Danang, 41 Le Duan, Danang, Vietnam. E-mail of corresponding author: bqviet@ac.udn.vn*

<sup>d</sup> *New Industry Creation Hatchery Center, Tohoku University, Sendai, 980-8579, Japan.*

<sup>e</sup> *School of Physics, Institute of Science, Suranaree University of Technology, 111 University Avenue, Nakhon Ratchasima, 30000 Thailand.*

<sup>f</sup> *Physics and Nanotechnology, SRM Institute of Science and Technology, Kattankurathur, Tamil Nadu, 603203 India.*

<sup>g</sup> *Department of Physics & Astronomy and Center for Computational Sciences, Mississippi State University, Starkville, Mississippi 39762, United States.*

<sup>h</sup> *Faculty of Chemical Engineering, The University of Danang—University of Science and Technology, Danang City 550000, Vietnam.*

---

# Thi H. Ho and Viet Q. Bui contributed equally to this work.

\* Corresponding author: Viet Q. Bui, email: [bqviet@ac.udn.vn](mailto:bqviet@ac.udn.vn); [mrbiuquocviet@gmail.com](mailto:mrbiuquocviet@gmail.com)

**Table S1.** Adsorption energies of N<sub>2</sub> on the active B site, categorized by both end-on and side-on configurations.

| Structures                | <b>B@V<sub>Re</sub></b> | <b>B@V<sub>S</sub></b> | <b>B@V<sub>ReS</sub></b> | <b>B@V<sub>ReS2</sub></b> | <b>dB@V<sub>Re</sub></b> |
|---------------------------|-------------------------|------------------------|--------------------------|---------------------------|--------------------------|
| E <sub>End-on</sub> (eV)  | 0.439                   | -0.944                 | 0.181                    | -0.261                    | 0.357                    |
| E <sub>Side-on</sub> (eV) | No interaction          | 0.561                  | 0.235                    | -0.101                    | No interaction           |

**Table S2.** Overview of NH<sub>3</sub>\* adsorption energy values ( $\Delta G_{NH_3^*}$ ) on B-doped defective ReS<sub>2</sub>, derived from activity assessments. The  $\Delta G_{NH_3^*}$  represents the free energy of gaseous NH<sub>3</sub>.

| Structures                | ZPE  | TS   | $\Delta G_{NH_3^*}$ |
|---------------------------|------|------|---------------------|
| <b>B@V<sub>Re</sub></b>   | 1.07 | 0.01 | -0.19               |
| <b>B@V<sub>S</sub></b>    | 1.06 | 0.01 | -1.16               |
| <b>B@V<sub>ReS</sub></b>  | 1.06 | 0.01 | -0.46               |
| <b>B@V<sub>ReS2</sub></b> | 1.06 | 0.01 | -0.43               |
| <b>dB@V<sub>Re</sub></b>  | 1.08 | 0.01 | -0.25               |

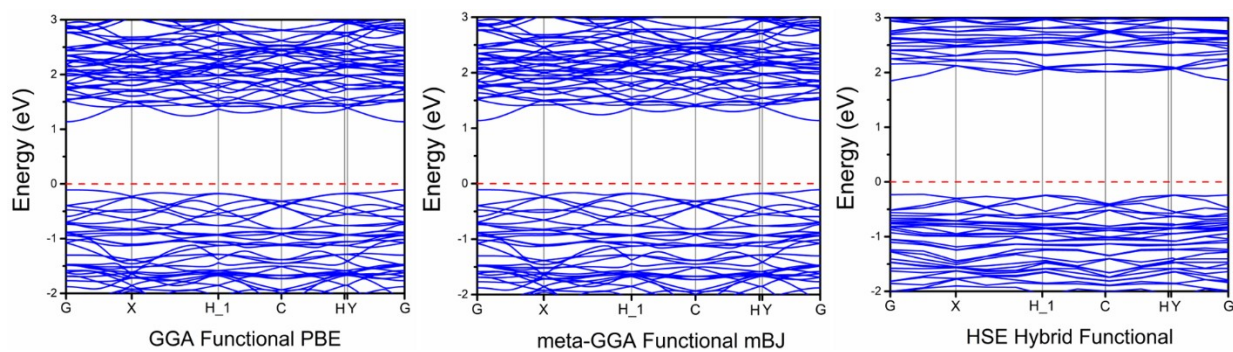

**Figure S1.** The band structures of ReS2 were determined using DFT with GGA-PBE, metaGGA-mBJ,<sup>S1</sup> and the HSE06 hybrid functional<sup>S2,S3</sup> methods.

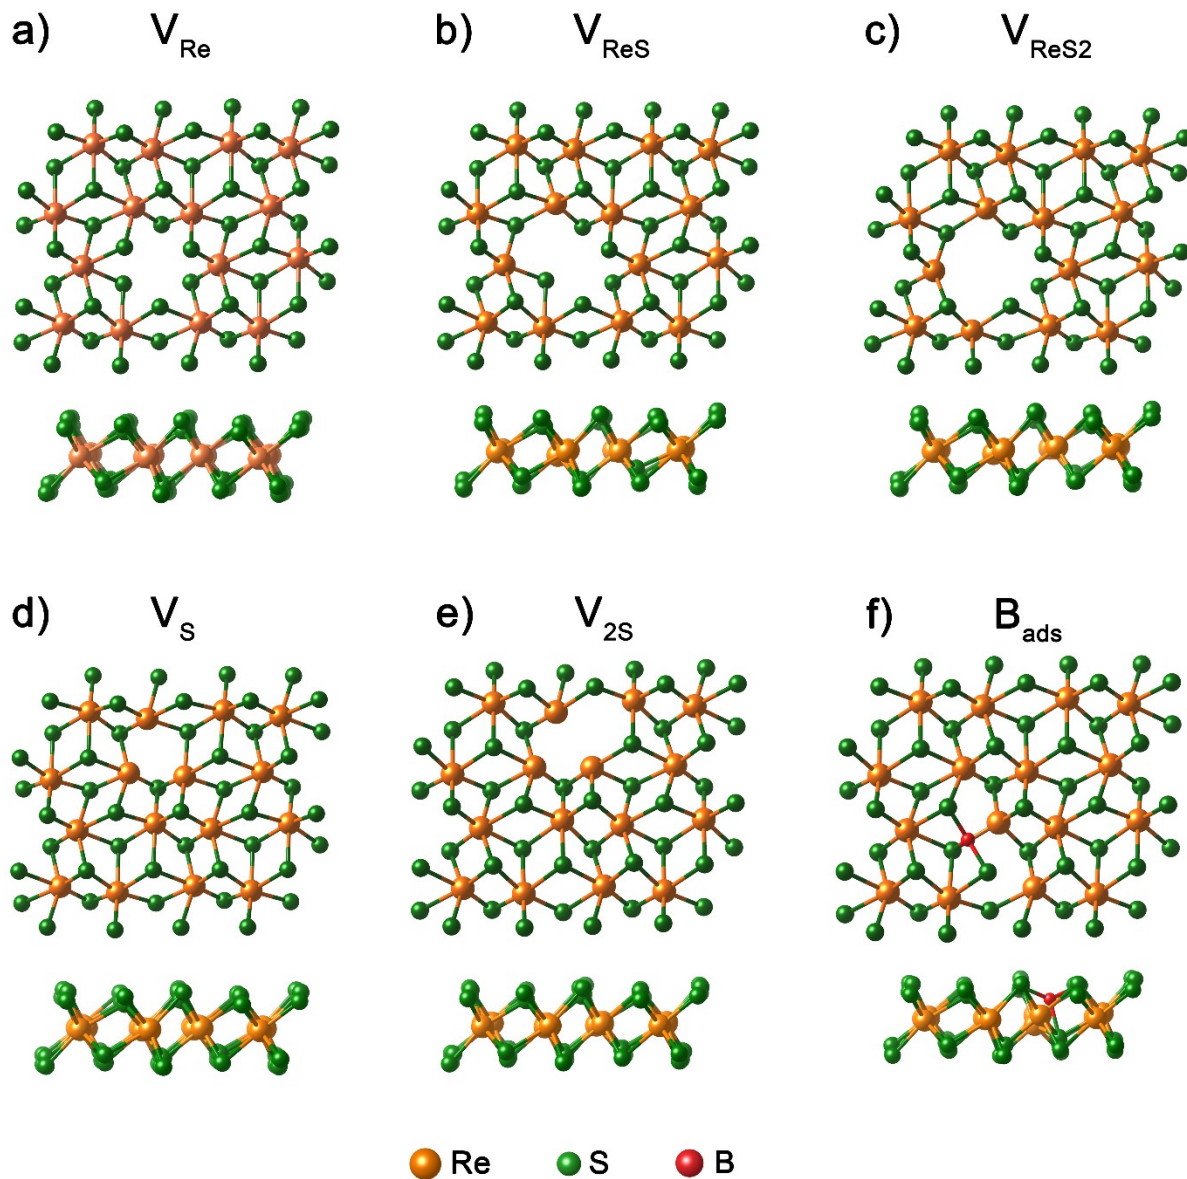

**Figure S2.** Optimized configurations of other five defective  $\text{ReS}_2$  structures: (a) one-Re vacancy, (b) one-Re-and-one-S vacancy, (c) one-Re-and-two-S vacancy, (d) one-S vacancy, (e) two-S vacancy, and (f) B-adsorbed  $\text{ReS}_2$ , respectively. Orange, green, and red spheres represent Re, S, and B atoms. Symbol (V) denotes the vacancy sites of the  $\text{ReS}_2$  substrate. Top and side views are provided for each configuration.

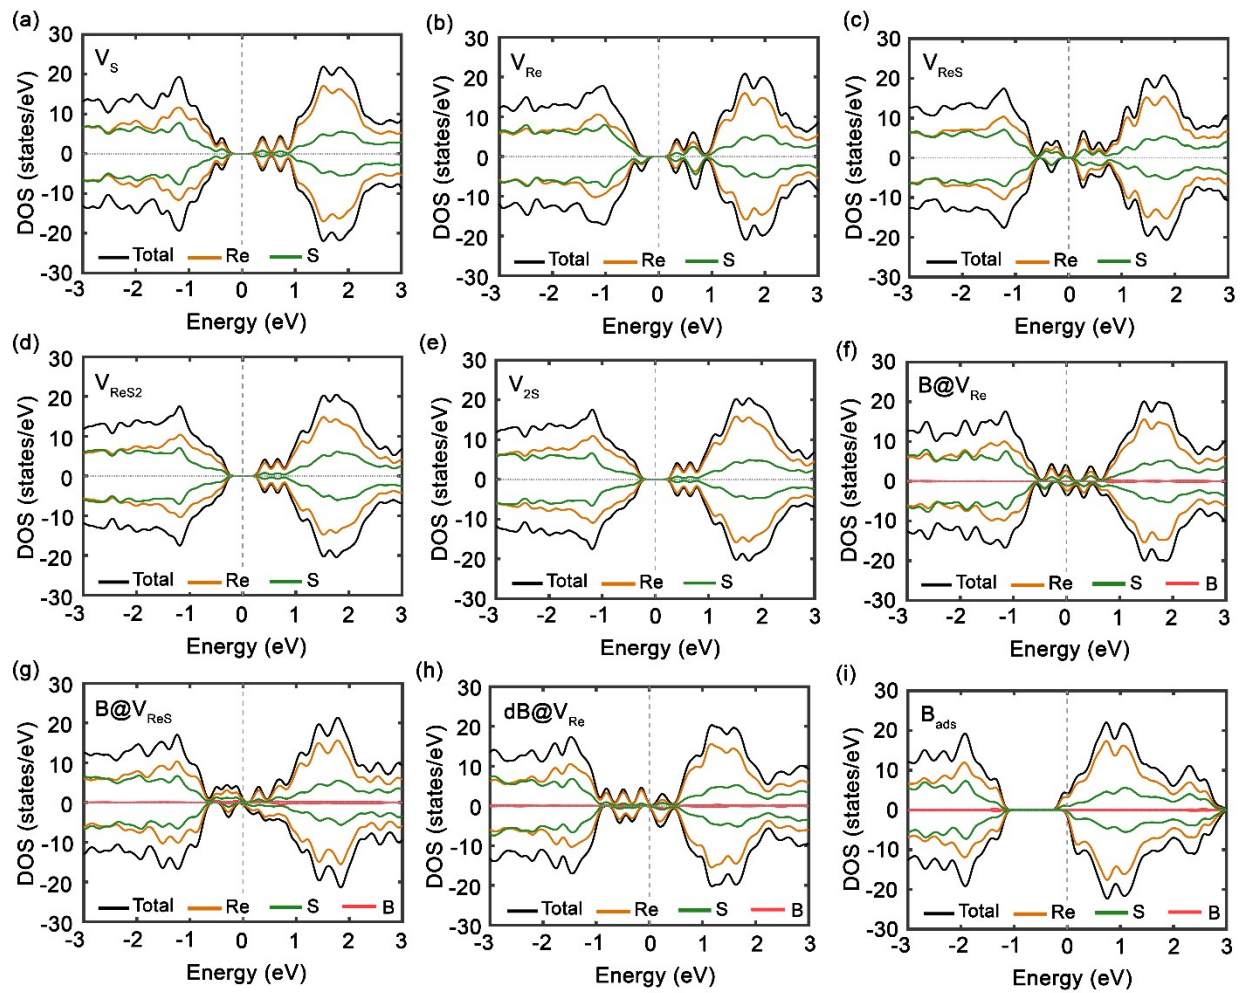

**Figure S3.** Partial density of states (PDOS) for (a)  $V_S$ , (b)  $V_{Re}$ , (c)  $V_{ReS}$ , (d)  $V_{ReS2}$ , (e)  $V_{2S}$ , (f)  $B@V_{Re}$ , (g)  $B@V_{ReS}$ , (h)  $dB@V_{Re}$ , and (i)  $B_{ads}$ . Black, orange, green, and red lines represent total DOS, PDOS of Re, S, and B atoms, respectively.

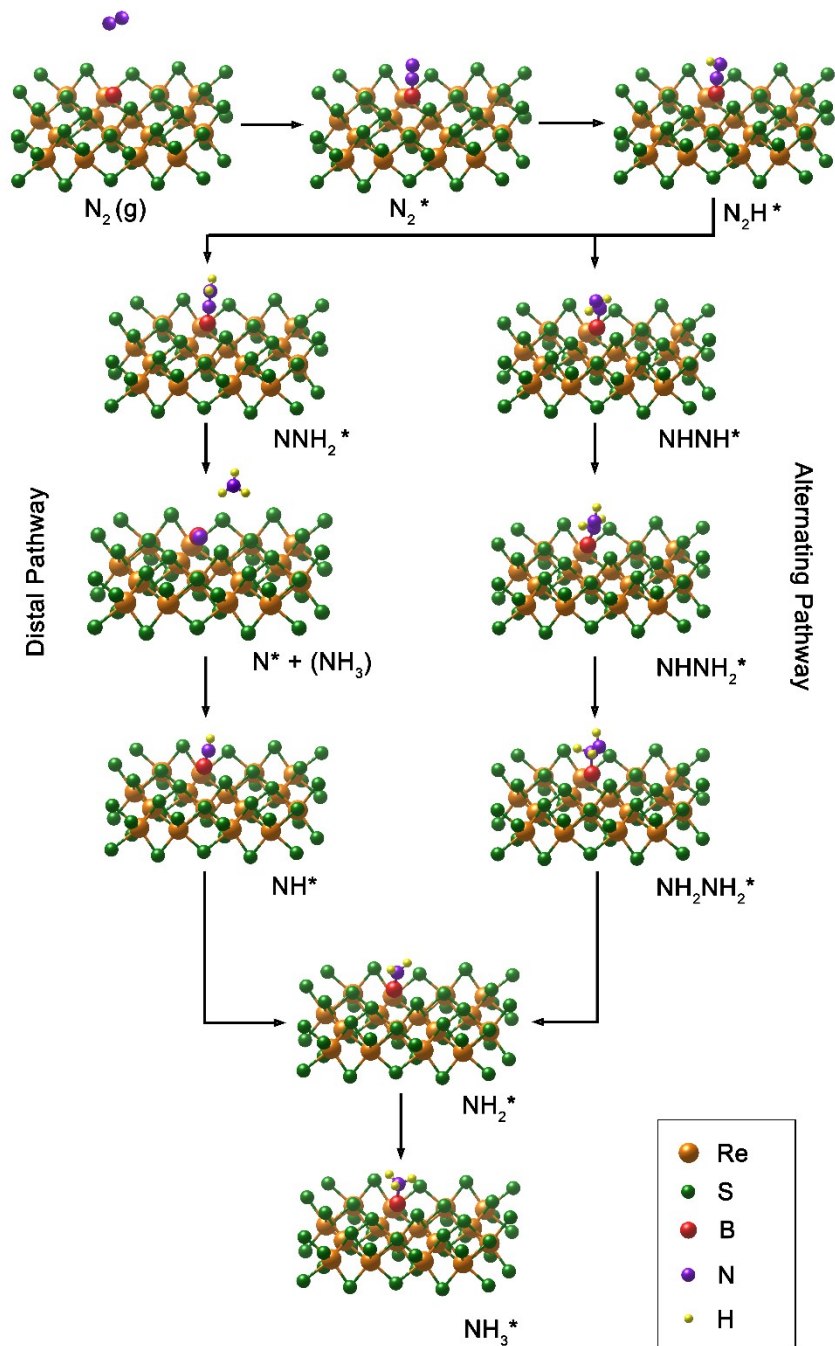

**Figure S4.** Schematic view of distal (left) and alternating (right) NRR reaction pathways for B-doped ReS<sub>2</sub> with S defect. Orange, green, red, purple, and yellow spheres represent Re, S, B, N, and H atoms, respectively.

## References

- S1. A. D. Becke, *J. Chem. Phys.*, 1993, **98**, 1372-1377.
- S2. A. D. Becke and E. R. Johnson, *J. Chem. Phys.*, 2006, **124**, 221101.
- S3. F. Tran and P. Blaha, *Phys. Rev. Lett.*, 2009, **102**, 226401.
